# Supplementary material for: Determining how biotic and abiotic variables affect the shell condition and parameters of Heliconoides inflatus pteropods from a sediment trap in the Cariaco Basin
Source: Copernicus journal article supplement (doi:10.5194/bg-17-1975-2020), 2020-04-14
Supplement: Supplementary file 1 [file bg-17-1975-2020-supplement.pdf]

Supplement of Biogeosciences, 17, 1975–1990, 2020  
<https://doi.org/10.5194/bg-17-1975-2020-supplement>  
© Author(s) 2020. This work is distributed under  
the Creative Commons Attribution 4.0 License.

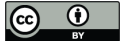

*Supplement of*

**Determining how biotic and abiotic variables affect the shell condition and parameters of *Heliconoides inflatus* pteropods from a sediment trap in the Cariaco Basin**

**Rosie L. Oakes and Jocelyn A. Sessa**

*Correspondence to:* Rosie L. Oakes (roakes@drexel.edu)

The copyright of individual parts of the supplement might differ from the CC BY 4.0 License.

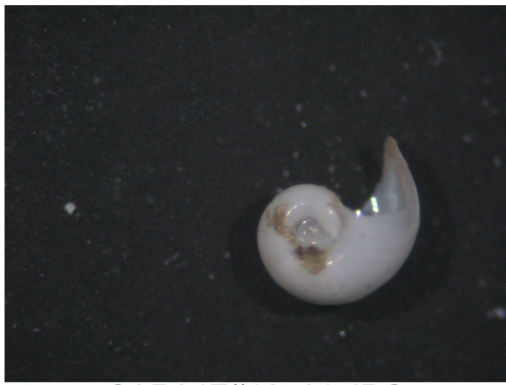

CAR34Z#10\_01.JPG

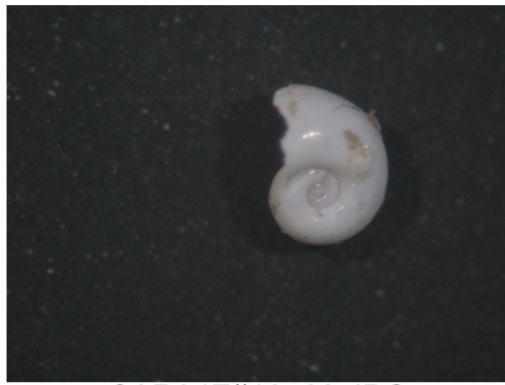

CAR34Z#10\_02.JPG

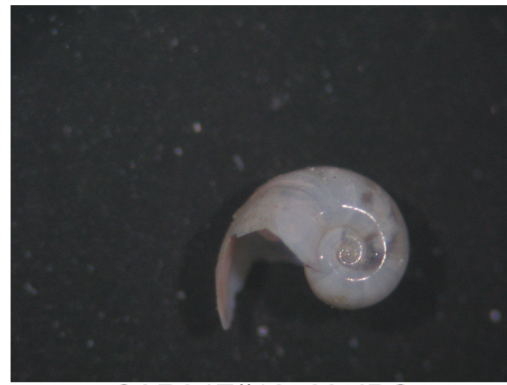

CAR34Z#10\_03.JPG

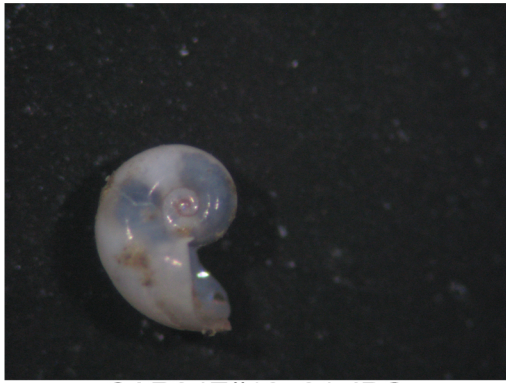

CAR34Z#10\_04.JPG

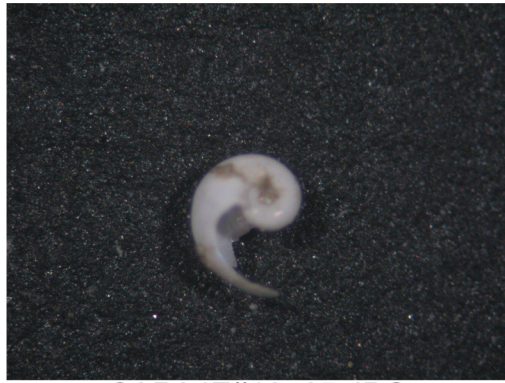

CAR34Z#10\_05.JPG

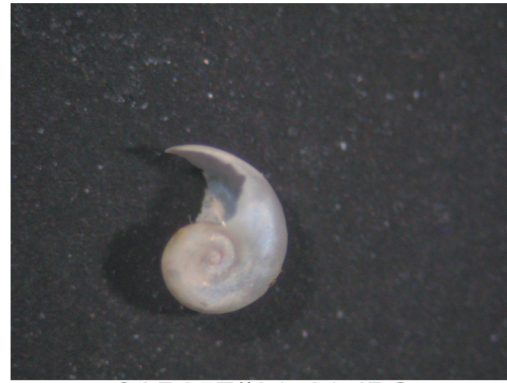

CAR35Z#04\_01.JPG

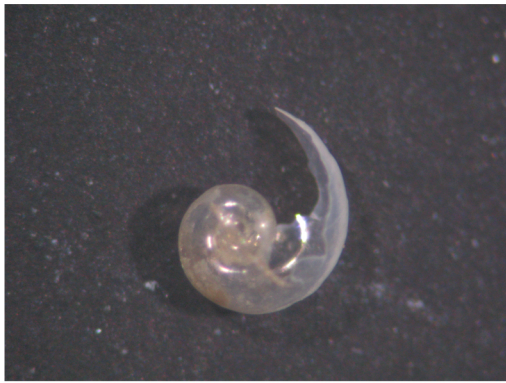

CAR35Z#04\_02.JPG

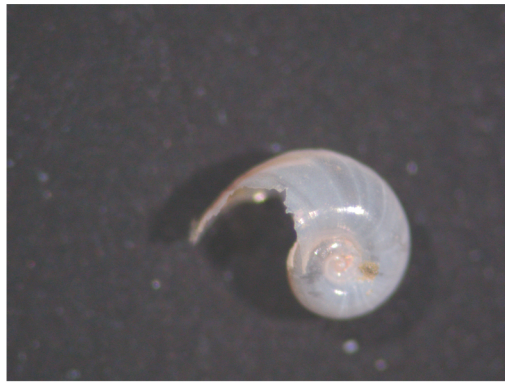

CAR35Z#04\_03.JPG

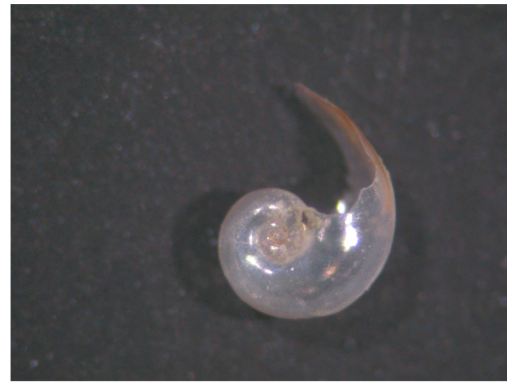

CAR35Z#04\_04.JPG

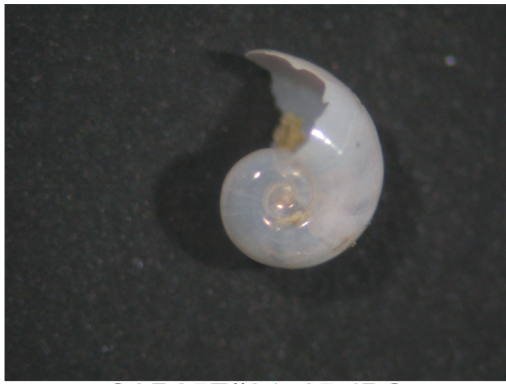

CAR35Z#04\_05.JPG

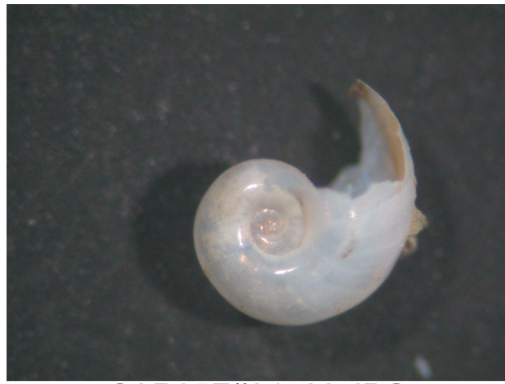

CAR35Z#04\_06.JPG

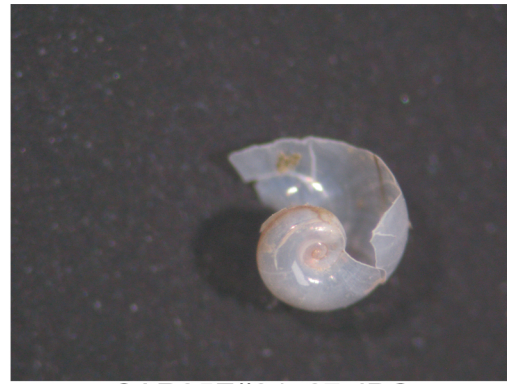

CAR35Z#04\_07.JPG

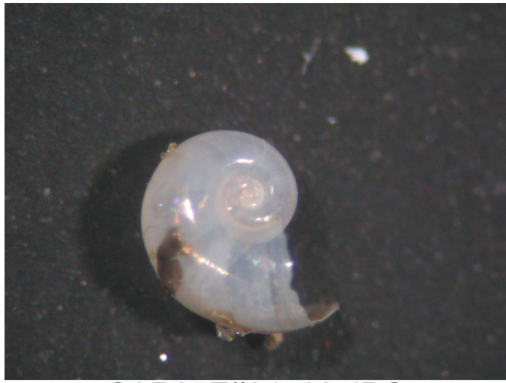

CAR35Z#04\_08.JPG

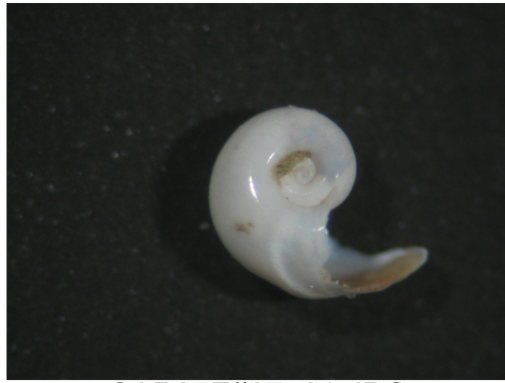

CAR35Z#07\_01.JPG

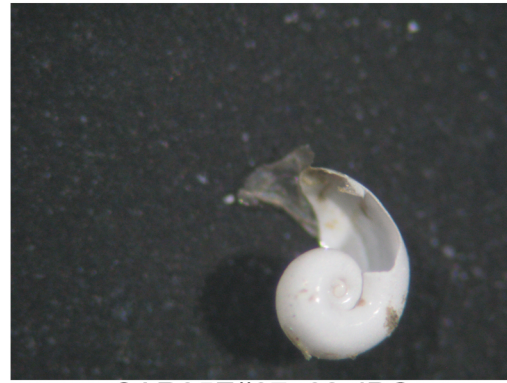

CAR35Z#07\_02.JPG

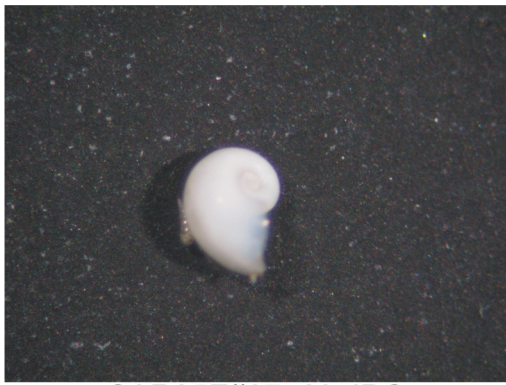

CAR35Z#07\_03.JPG

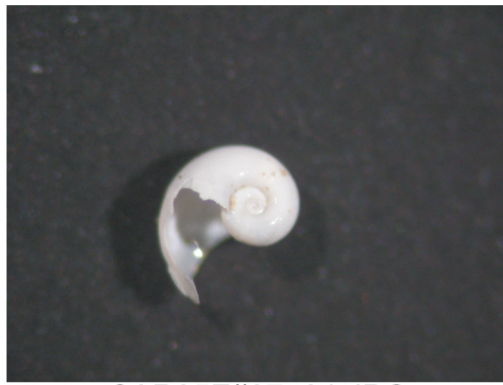

CAR35Z#07\_04.JPG

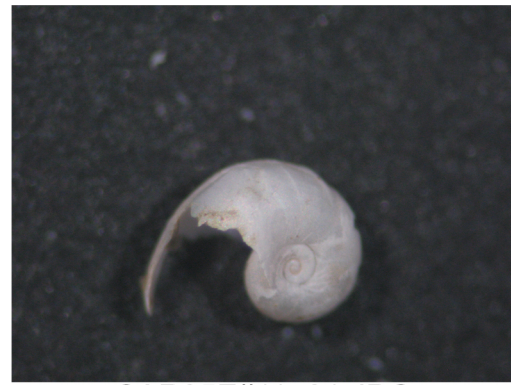

CAR35Z#11\_01.JPG

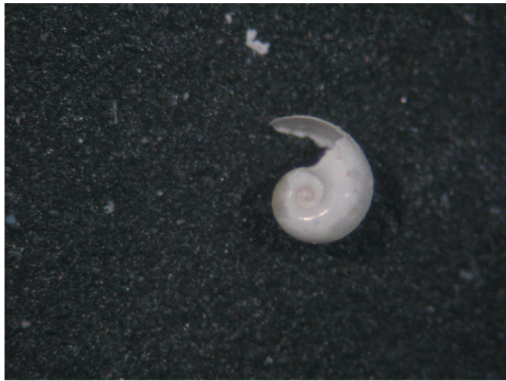

CAR35Z#11\_02.JPG

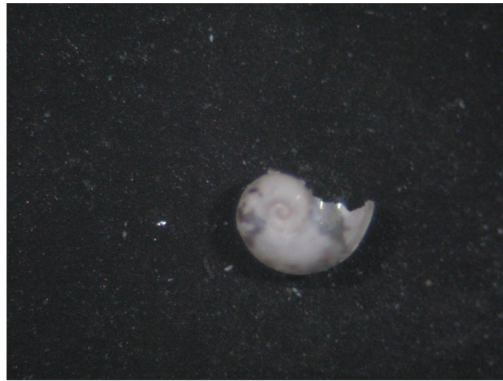

CAR35Z#11\_03.JPG

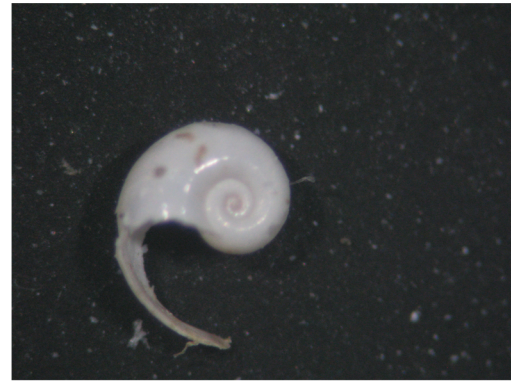

CAR35Z#11\_04.JPG

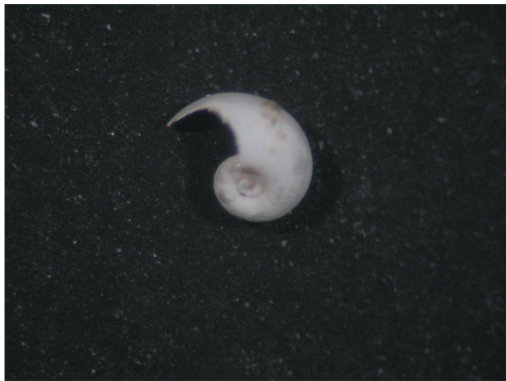

CAR35Z#11\_05.JPG

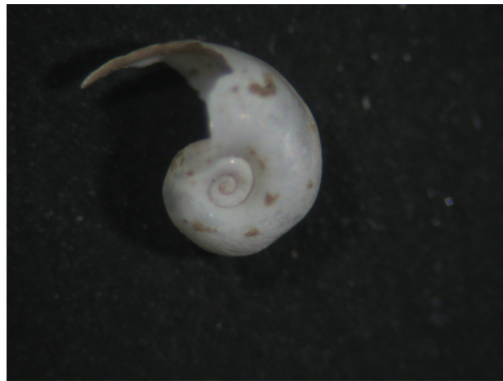

CAR35Z#13.JPG

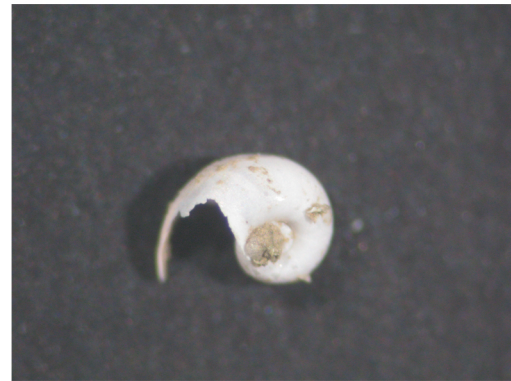

CAR35Z#13\_02.JPG

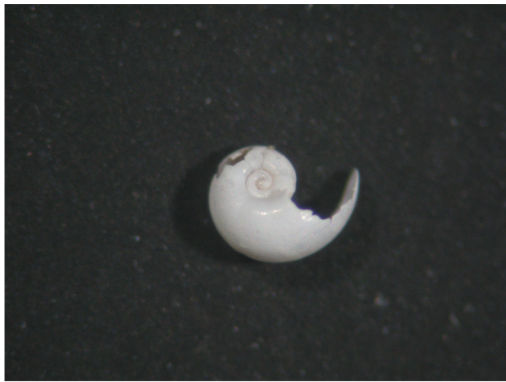

CAR35Z#13\_03.JPG

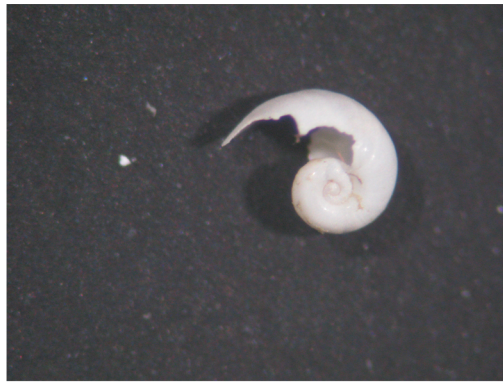

CAR35Z#13\_04.JPG

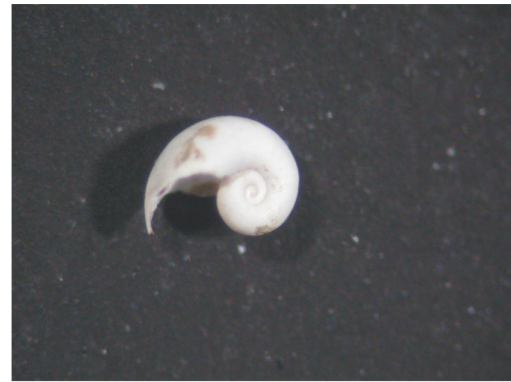

CAR35Z#13\_05.JPG

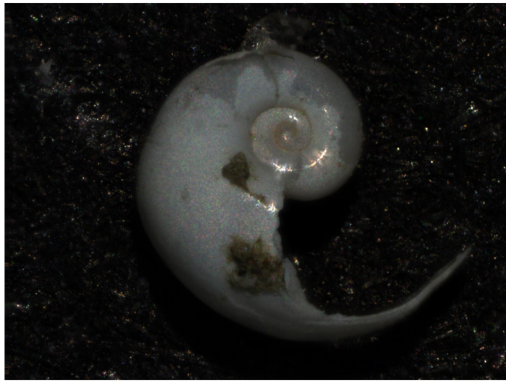

CAR35Z#13\_06.jpg

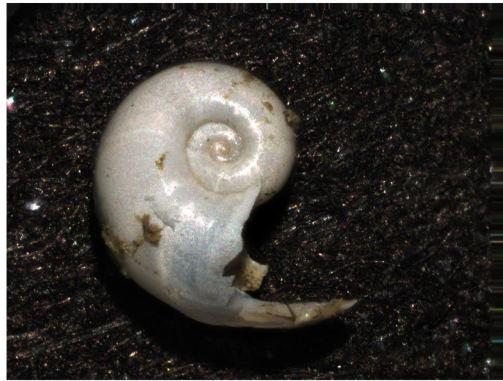

CAR35Z#13\_07.jpg

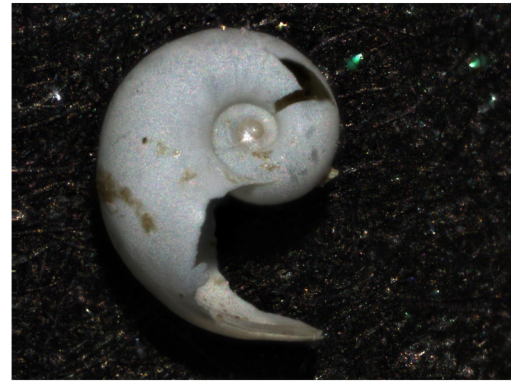

CAR35Z#13\_10.jpg

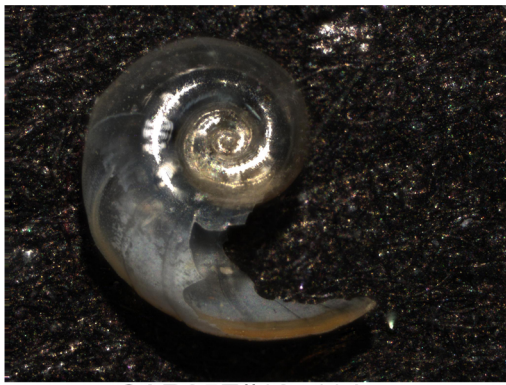

CAR35Z#13\_11.jpg

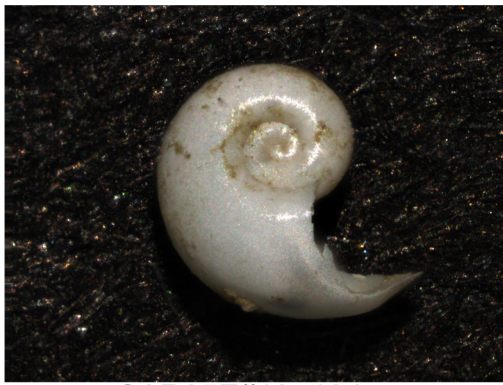

CAR35Z#13\_13.jpg

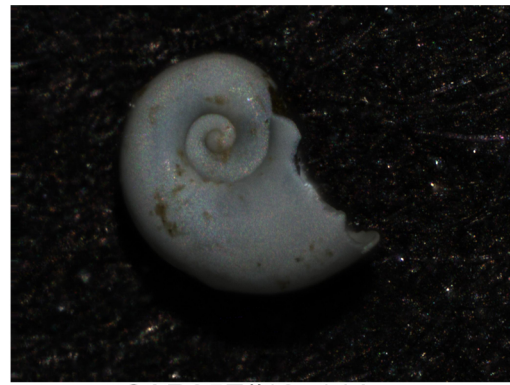

CAR35Z#13\_14.jpg

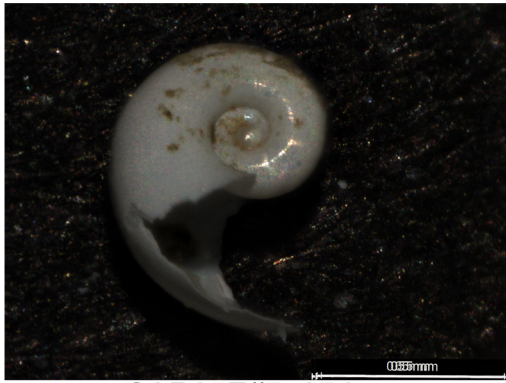

CAR35Z#7\_05.jpg

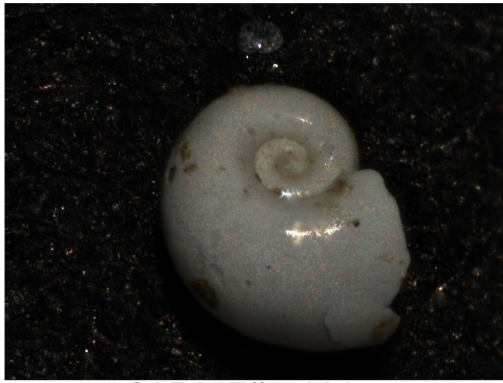

CAR35Z#7\_09.jpg

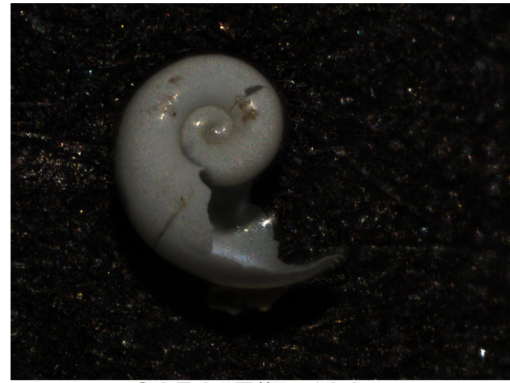

CAR35Z#7\_10.jpg

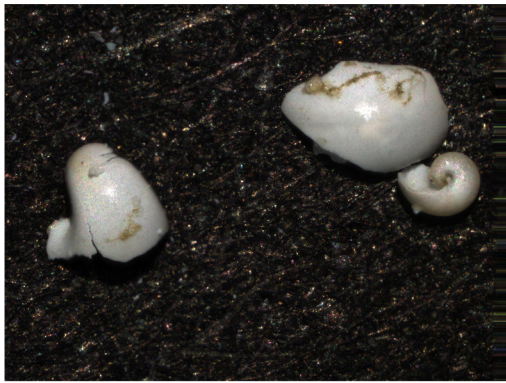

CAR35Z#7\_11.jpg

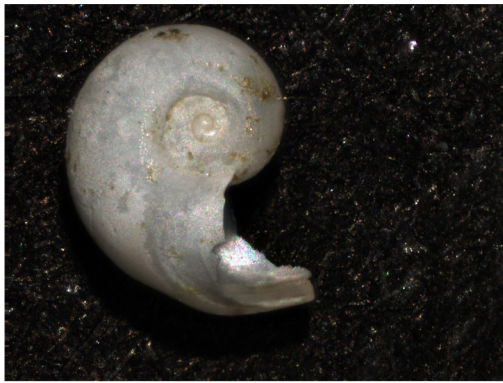

CAR35Z#7\_14.jpg

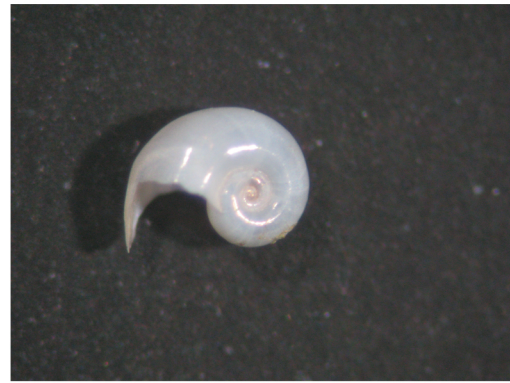

CAR36Z#03\_01.JPG

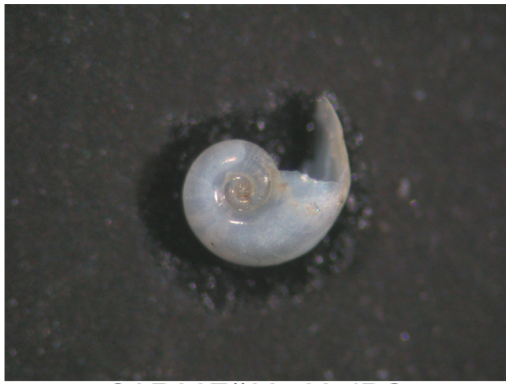

CAR36Z#03\_02.JPG

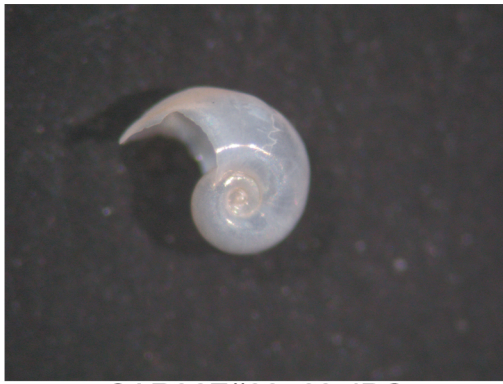

CAR36Z#03\_03.JPG

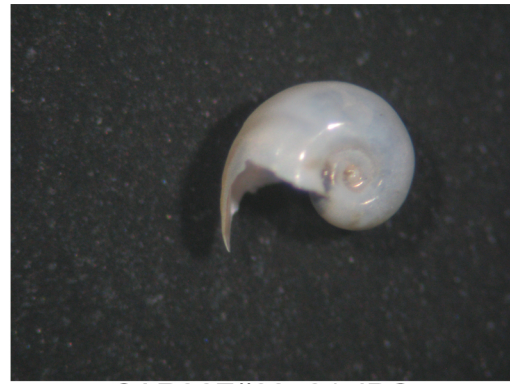

CAR36Z#03\_04.JPG

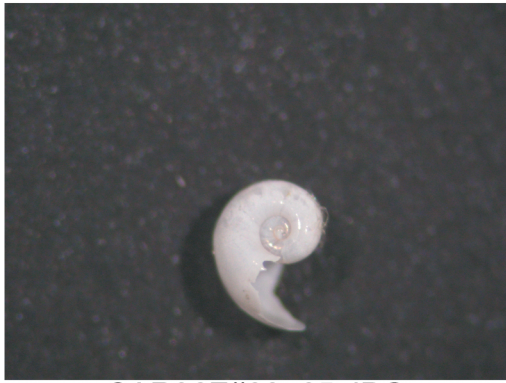

CAR36Z#03\_05.JPG

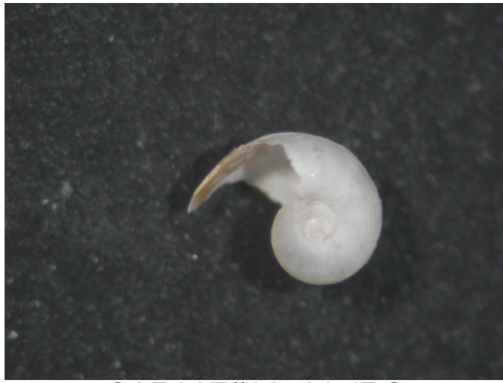

CAR36Z#06\_01.JPG

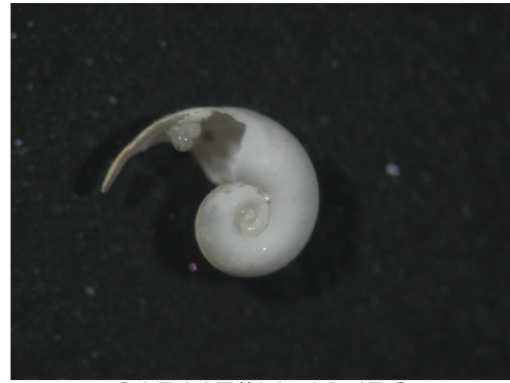

CAR36Z#06\_02.JPG

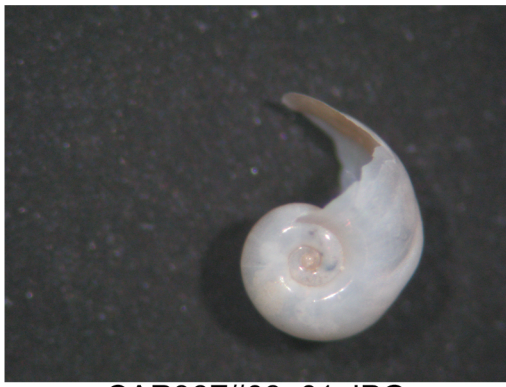

CAR36Z#08\_01.JPG

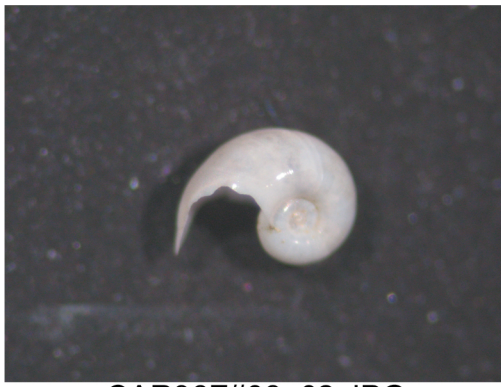

CAR36Z#08\_02.JPG

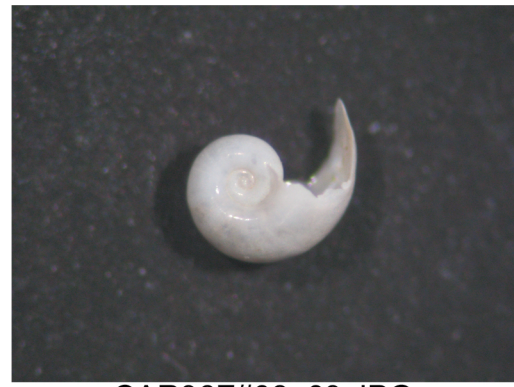

CAR36Z#08\_03.JPG

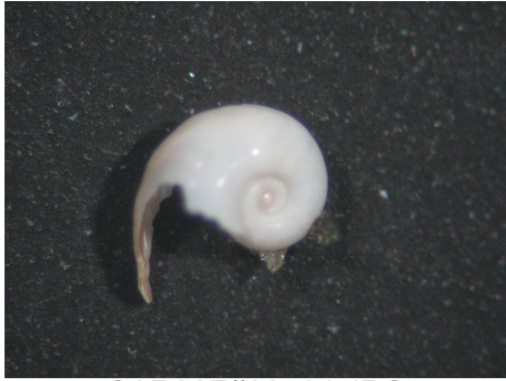

CAR36Z#08\_04.JPG

Figure S1: Light microscope images

## Methods

**Table S1: Shell whorl, length, thickness, and volume measurements, and a record of which machine the specimen was scanned on. GE = volume|x m, General Electric, Lewistown, PA. AMNH = volume|x s, American Museum of Natural History, New York, NY.**

| Sample name  | date (DD/MM/YYYY) | Number of whorls | Length (mm) | Volume (mm <sup>3</sup> ) | thickness (mm) | Scanned at | ANSP Catalog No. |
|--------------|-------------------|------------------|-------------|---------------------------|----------------|------------|------------------|
| CAR34Z#10_01 | 21/03/2013        | 2 5/8            | 1.549       | 0.109                     | 0.018          | GE         | 477912           |
| CAR34Z#10_02 | 21/03/2013        | 2 1/2            | 1.709       | 0.099                     | 0.016          | GE         | 477912           |
| CAR34Z#10_03 | 21/03/2013        | 2 5/8            | 1.876       | 0.112                     | 0.018          | GE         | 477912           |
| CAR34Z#10_04 | 21/03/2013        | 2 1/2            | 1.829       | 0.142                     | 0.022          | GE         | 477912           |
| CAR34Z#10_05 | 21/03/2013        | 2 3/8            | 1.534       | 0.060                     | 0.014          | GE         | 477912           |
| CAR35Z#04_01 | 20/06/2013        | 2 1/2            | 0.832       | 0.017                     | 0.008          | GE         | 477913           |
| CAR35Z#04_02 | 20/06/2013        | 2 3/4            | 1.048       | 0.024                     | 0.012          | GE         | 477913           |
| CAR35Z#04_03 | 20/06/2013        | 2 3/4            | 0.805       | 0.030                     | 0.012          | GE         | 477913           |
| CAR35Z#04_04 | 20/06/2013        | 2 3/4            | 1.256       | 0.030                     | 0.013          | GE         | 477913           |
| CAR35Z#04_05 | 20/06/2013        | 2 3/4            | 1.018       | 0.032                     | 0.011          | GE         | 477913           |
| CAR35Z#04_06 | 20/06/2013        | 2 7/8            | 1.135       | 0.037                     | 0.012          | GE         | 477913           |
| CAR35Z#04_08 | 20/06/2013        | 2 3/4            | 1.092       | 0.029                     | 0.011          | GE         | 477913           |
| CAR35Z#07_01 | 01/08/2013        | 2 3/4            | 1.145       | 0.028                     | 0.012          | GE         | 477914           |
| CAR35Z#07_02 | 01/08/2013        | 2 3/4            | 0.923       | 0.015                     | 0.009          | GE         | 477914           |
| CAR35Z#07_04 | 01/08/2013        | 2 1/2            | 0.843       | 0.013                     | 0.010          | GE         | 477914           |
| CAR35Z#07_05 | 01/08/2013        | 2 3/8            | 0.788       | 0.010                     | 0.011          | AMNH       | 477914           |
| CAR35Z#07_08 | 01/08/2013        | 2 3/8            | 0.821       | 0.007                     | 0.007          | AMNH       | 477914           |
| CAR35Z#07_09 | 01/08/2013        | 2 3/8            | 0.775       | 0.011                     | 0.010          | AMNH       | 477914           |
| CAR35Z#07_10 | 01/08/2013        | 2 1/4            | 0.694       | 0.006                     | 0.006          | AMNH       | 477914           |
| CAR35Z#07_11 | 01/08/2013        | 2 1/4            | 0.741       | 0.008                     | 0.005          | AMNH       | 477914           |
| CAR35Z#07_14 | 01/08/2013        | 2 5/8            | 1.062       | 0.019                     | 0.007          | AMNH       | 477914           |
| CAR35Z#11_02 | 26/09/2013        | 2 1/4            | 0.735       | 0.007                     | 0.008          | GE         | 477915           |
| CAR35Z#11_03 | 26/09/2013        | 2 1/4            | 0.681       | 0.005                     | 0.007          | GE         | 477915           |
| CAR35Z#11_04 | 26/09/2013        | 2 7/8            | 1.187       | 0.026                     | 0.016          | GE         | 477915           |
| CAR35Z#13_01 | 24/10/2013        | 2 7/8            | 1.164       | 0.028                     | 0.009          | GE         | 477916           |
| CAR35Z#13_02 | 24/10/2013        | 2 5/8            | 1.042       | 0.020                     | 0.009          | GE         | 477916           |
| CAR35Z#13_05 | 24/10/2013        | 2 1/2            | 0.886       | 0.017                     | 0.011          | GE         | 477916           |
| CAR35Z#13_06 | 24/10/2013        | 2 5/8            | 0.902       | 0.012                     | 0.011          | AMNH       | 477916           |
| CAR35Z#13_07 | 24/10/2013        | 2 7/8            | 1.270       | 0.030                     | 0.011          | AMNH       | 477916           |
| CAR35Z#13_10 | 24/10/2013        | 2 3/4            | 1.070       | 0.022                     | 0.010          | AMNH       | 477916           |
| CAR35Z#13_11 | 24/10/2013        | 2 7/8            | 1.400       | 0.038                     | 0.010          | AMNH       | 477916           |
| CAR35Z#13_13 | 24/10/2013        | 2 1/2            | 0.974       | 0.018                     | 0.009          | AMNH       | 477916           |
| CAR35Z#13_14 | 24/10/2013        | 2 1/2            | 0.729       | 0.010                     | 0.009          | AMNH       | 477916           |
| CAR36Z#03_01 | 08/12/2013        | 2 3/4            | 0.988       | 0.025                     | 0.013          | GE         | 477917           |
| CAR36Z#03_02 | 08/12/2013        | 2 3/4            | 0.985       | 0.023                     | 0.009          | GE         | 477917           |

|              |            |       |       |       |       |      |        |
|--------------|------------|-------|-------|-------|-------|------|--------|
| CAR36Z#03_03 | 08/12/2013 | 2 5/8 | 0.985 | 0.023 | 0.011 | GE   | 477917 |
| CAR36Z#03_04 | 08/12/2013 | 2 5/8 | 1.063 | 0.029 | 0.014 | GE   | 477917 |
| CAR36Z#06_01 | 19/01/2014 | 2 5/8 | 0.931 | 0.018 | 0.011 | GE   | 477918 |
| CAR36Z#06_02 | 19/01/2014 | 2 7/8 | 0.979 | 0.029 | 0.011 | GE   | 477918 |
| CAR36Z#08_01 | 16/02/2014 | 2 7/8 | 1.117 | 0.036 | 0.012 | GE   | 477919 |
| CAR36Z#08_02 | 16/02/2014 | 2 3/4 | 1.016 | 0.026 | 0.015 | GE   | 477919 |
| CAR36Z#08_03 | 16/02/2014 | 2 5/8 | 0.938 | 0.023 | 0.010 | GE   | 477919 |
| CAR36Z#08_04 | 16/02/2014 | 2 3/4 | 0.972 | 0.027 | 0.015 | GE   | 477919 |
| CAR36Z#08_05 | 16/02/2014 | 2 3/4 | 1.150 | 0.022 | 0.009 | AMNH | 477919 |

Not all 44 specimens could be scanned using the same equipment due to the closure of the GE facility in Lewistown, and limited availability of the scanner at AMNH. To test the impact of these changes on the analyses conducted in this paper, one specimen, CAR35Z#04\_01, was scanned 4 times. The details of each scan are highlighted in Table S2.

**Table S2: Scan parameters for the repeat scans run on specimen CAR35Z#04\_01 to test the impact of different scanners and scan settings on the measurements of the *Heliconoides inflatus* shells in this study.**

|                         | Location | Scanner (GE Phoenix) | Target  | Power (kV) | Current ( $\mu$ A) | Total # images | Exposure time (ms) | # images per view   |
|-------------------------|----------|----------------------|---------|------------|--------------------|----------------|--------------------|---------------------|
| Original scan           | GE       | v tome x m           | diamond | 65         | 230                | 1000           | 500                | Average 5<br>Skip 1 |
| AMNH scan               | AMNH     | v tome x s           | diamond | 65         | 230                | 1500           | 400                | Average 3<br>Skip 1 |
| AMNH rescan             | AMNH     | v tome x s           | diamond | 65         | 230                | 1500           | 400                | Average 3<br>Skip 1 |
| AMNH scan with GE setup | AMNH     | v tome x s           | diamond | 65         | 230                | 1000           | 500                | Average 5<br>Skip 1 |

The four repeat scans did show some variability (Fig. S2). However, despite this, the modal shell thickness of the shell analysed in all four scans is 0.008 mm. This demonstrates that modal shell thickness is a robust measurement and was not impacted by the different scanners and scan parameters used in this study.

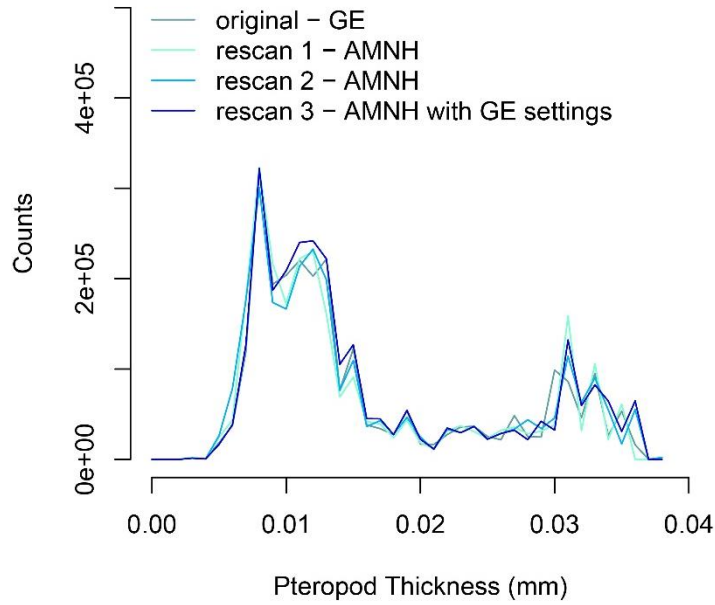

**Figure S2:** Shell thickness histograms from the four repeat scans of specimens CAR35Z#04\_01. Although there is some variability between the four records, the modal shell thickness is recorded as 0.008 mm in all four scans. This suggests that modal shell thickness is a robust measurement and was not affected by the different scanners and scan parameters used in this study.

## Results

**Table S3:** Pteropod shell condition scores assessed using the LDX and opacity methods

| Sample       | trap # | day | Shell condition |         |
|--------------|--------|-----|-----------------|---------|
|              |        |     | LDX             | Opacity |
| CAR34Z#10_01 | 10     | 79  | 2.0             | 0.39    |
| CAR34Z#10_02 | 10     | 79  | 2.0             | 0.40    |
| CAR34Z#10_03 | 10     | 79  | 1.5             | 0.31    |
| CAR34Z#10_04 | 10     | 79  | 2.0             | 0.33    |
| CAR34Z#10_05 | 10     | 79  | 2.5             | 0.43    |
| CAR35Z#04_01 | 4      | 170 | 2.5             | 0.40    |
| CAR35Z#04_02 | 4      | 170 | 0.0             | 0.17    |
| CAR35Z#04_03 | 4      | 170 | 1.0             | 0.36    |
| CAR35Z#04_04 | 4      | 170 | 0.0             | 0.23    |
| CAR35Z#04_05 | 4      | 170 | 1.0             | 0.39    |
| CAR35Z#04_06 | 4      | 170 | 1.5             | 0.40    |
| CAR35Z#04_07 | 4      | 170 | 0.5             | 0.31    |
| CAR35Z#04_08 | 4      | 170 | 1.0             | 0.38    |
| CAR35Z#07_01 | 7      | 212 | 2.0             | 0.43    |
| CAR35Z#07_02 | 7      | 212 | 2.0             | 0.59    |
| CAR35Z#07_03 | 7      | 212 | 2.0             | 0.59    |
| CAR35Z#07_04 | 7      | 212 | 2.0             | 0.74    |



|              |    |     |     |      |
|--------------|----|-----|-----|------|
| CAR35Z#07_05 | 7  | 212 | 2.0 | 0.36 |
| CAR35Z#07_09 | 7  | 212 | 2.0 | 0.35 |
| CAR35Z#07_10 | 7  | 212 | 2.0 | 0.33 |
| CAR35Z#07_11 | 7  | 212 | 2.0 | 0.57 |
| CAR35Z#07_14 | 7  | 212 | 2.5 | 0.45 |
| CAR35Z#11_01 | 11 | 268 | 4.0 | 0.43 |
| CAR35Z#11_02 | 11 | 268 | 2.0 | 0.46 |
| CAR35Z#11_03 | 11 | 268 | 3.0 | 0.40 |
| CAR35Z#11_04 | 11 | 268 | 2.5 | 0.46 |
| CAR35Z#11_05 | 11 | 268 | 4.0 | 0.48 |
| CAR35Z#13_01 | 13 | 296 | 4.0 | 0.44 |
| CAR35Z#13_02 | 13 | 296 | 3.0 | 0.60 |
| CAR35Z#13_03 | 13 | 296 | 2.0 | 0.51 |
| CAR35Z#13_04 | 13 | 296 | 2.0 | 0.58 |
| CAR35Z#13_05 | 13 | 296 | 3.0 | 0.64 |
| CAR35Z#13_06 | 13 | 296 | 2.5 | 0.33 |
| CAR35Z#13_07 | 13 | 296 | 2.0 | 0.53 |
| CAR35Z#13_10 | 13 | 296 | 3.0 | 0.58 |
| CAR35Z#13_11 | 13 | 296 | 0.5 | 0.19 |
| CAR35Z#13_13 | 13 | 296 | 2.0 | 0.51 |
| CAR35Z#13_14 | 13 | 296 | 3.0 | 0.27 |
| CAR36#03_01  | 3  | 341 | 1.0 | 0.49 |
| CAR36#03_02  | 3  | 341 | 0.5 | 0.35 |
| CAR36#03_03  | 3  | 341 | 1.0 | 0.38 |
| CAR36#03_04  | 3  | 341 | 1.5 | 0.43 |
| CAR36#03_05  | 3  | 341 | 2.0 | 0.50 |
| CAR36Z#06_01 | 6  | 383 | 3.0 | 0.50 |
| CAR36Z#06_02 | 6  | 383 | 2.0 | 0.46 |
| CAR36Z#08_01 | 8  | 411 | 1.5 | 0.45 |
| CAR36Z#08_02 | 8  | 411 | 2.0 | 0.49 |
| CAR36Z#08_03 | 8  | 411 | 2.0 | 0.44 |
| CAR36Z#08_04 | 8  | 411 | 2.0 | 0.57 |

**Table S4: Water chemistry and hydrographic measurements at 55 m depth from 12 time points through the year. The measurements were made on monthly cruises that did not directly correspond to the closing times of the sediment trap cups. Water chemistry parameters from 55 m were selected as this is the depth closest to the calcification depth of this species (75 m; Keul et al., 2017).**

| Month | Year | Temp. at 55m (°C) | Salinity at 55m (PSU) | Alkalinity at 55m (μmol/kg) | pH at 55m | Ωarag (calculated from TA and pH) | PO4 at 55 m (μM) | NO3 and NO2 at 55 m (μM) |
|-------|------|-------------------|-----------------------|-----------------------------|-----------|-----------------------------------|------------------|--------------------------|
| 3     | 2013 | 20.741            | 36.726                | 2390                        | 7.893     | 2.39                              | 0.48             | 8.12                     |
| 4     | 2013 | 21.816            | 36.903                | 2418                        | 7.949     | 2.80                              | 0.27             | 4.94                     |
| 5     | 2013 | 21.278            | 36.864                | 2419                        | 7.928     | 2.64                              | 0.32             | 6.16                     |
| 6     | 2013 | 22.574            | 36.873                | 2422                        | 7.959     | 2.93                              | 0.25             | 4.43                     |
| 7     | 2013 | 22.798            | 36.932                | 2436                        | 7.959     | 2.97                              | 0.17             | 3.83                     |
| 8     | 2013 |                   | 36.907                | 2425                        | 7.957     |                                   | 0.19             | 3.52                     |
| 9     | 2013 | 24.844            | 36.66                 | 2416                        | 8.033     | 3.59                              | 0.06             | 0.00                     |
| 10    | 2013 | 23.125            | 36.813                | 2425                        | 7.947     | 2.92                              | 0.35             | 5.37                     |
| 11    | 2013 | 24.152            | 36.738                | 2420                        | 7.989     | 3.25                              | 0.18             | 2.92                     |
| 12    | 2013 | 23.092            | 36.787                | 2420                        | 7.952     | 2.93                              | 0.32             | 4.90                     |
| 1     | 2014 | 20.643            | 36.734                | 2390                        | 7.884     | 2.34                              |                  | 8.84                     |
| 2     | 2014 | 20.64             | 36.723                | 2420                        | 7.865     | 2.28                              | 0.52             | 8.81                     |

**Table S5: Relationships among different shell parameters (whorls, diameter, thickness, and shell condition (LDX)), were examined relative to each other and to the sample collection date using a simple linear model. To account running multiple comparisons, *p* values were corrected using both the more conservative Bonferroni correction and the less conservative false discovery rate FDR)**

| test               | R <sub>2</sub> | <i>p</i> | Bonferonni | FDR   |
|--------------------|----------------|----------|------------|-------|
| amount~diameter    | 0.819          | 0.000    | 0.000      | 0.000 |
| amount~whorls      | 0.012          | 0.047    | 0.425      | 0.055 |
| thickness~diameter | 0.582          | 0.000    | 0.000      | 0.000 |
| thickness~amount   | 0.680          | 0.000    | 0.000      | 0.000 |
| thickness~whorls   | 0.089          | 0.049    | 0.444      | 0.055 |
| whorls~diameter    | 0.095          | 0.042    | 0.374      | 0.055 |
| LDX~day            | 0.028          | 0.251    | 1.000      | 0.251 |
| LDX~trap           | 0.357          | 0.000    | 0.000      | 0.000 |
| LDX~opacity        | 0.208          | 0.010    | 0.090      | 0.018 |

**Table S6: Results of a Welch’s t-test run to assess whether there is a significant difference between specimens sampled during times of upwelling (December - April, and times when there is no upwelling (i.e., during the rainy season (August - November)).**

| Category                 | Mean rainy season (no-upwelling) | Mean upwelling | <i>t</i> | <i>p</i> |
|--------------------------|----------------------------------|----------------|----------|----------|
| # whorls                 | 2.6                              | 2.7            | -1.752   | 0.0891   |
| shell diameter           | 0.94                             | 1.23           | -2.906   | 0.0080 * |
| amount of shell material | 0.0166                           | 0.0502         | -3.23    | 0.0052 * |
| modal shell thickness    | 0.009                            | 0.014          | -4.0597  | 0.0004 * |
| residual thickness       | -0.236                           | 0.266          | -2.337   | 0.0260 * |

\* = significant

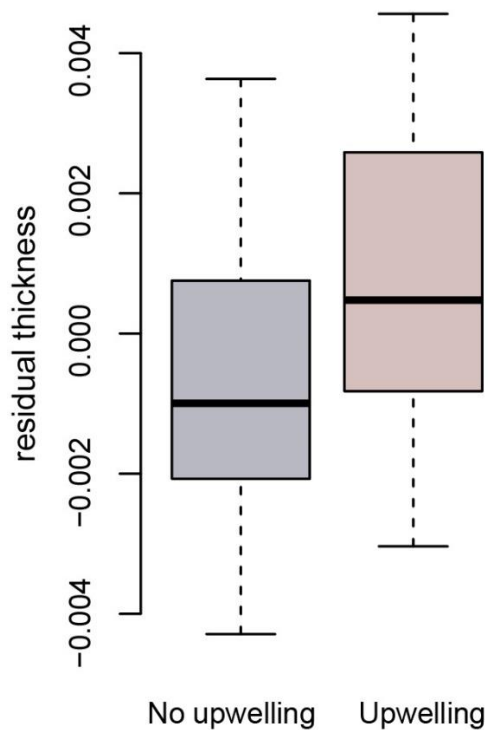

**Figure S3: The calculated residual shell thickness (i.e., the thickness once the influence of length on thickness has been removed) of specimens from times of upwelling (red) and times of no upwelling (grey) in the Cariaco Basin. Specimens collected during times of upwelling are significantly thicker than those which formed at times with no upwelling (Welch’s t-test:  $p = 0.0260$ )**
